# Supplementary material for: Single-Cell Transcriptome and Network Analyses Unveil Key Transcription Factors Regulating Mesophyll Cell Development in Maize
Source: MDPI journal article supplement (doi:10.3390/genes13020374), 2022-02-20
Supplement: s1 [file s1]

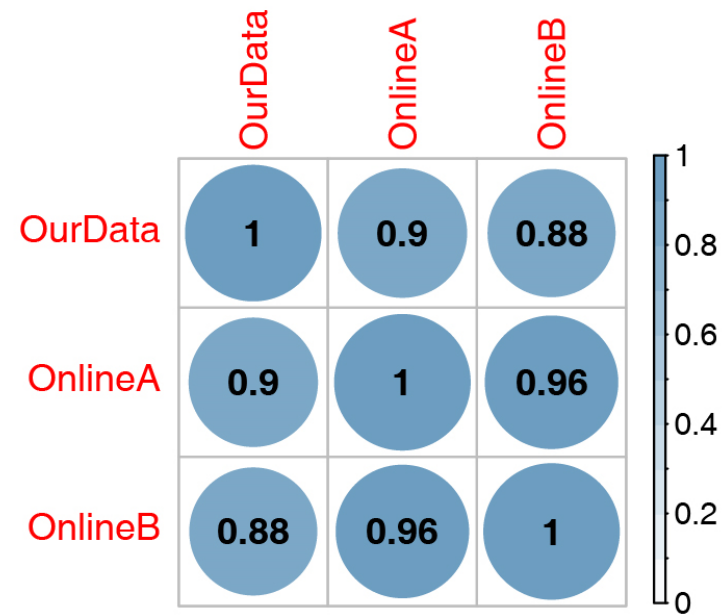

**Supplementary Figure S1. Heatmap showing the correlation coefficient between our scRNA-seq and the published scRNA-seq data generated from maize seedlings.**

The correlation coefficient was calculated using Spearman correlation test.

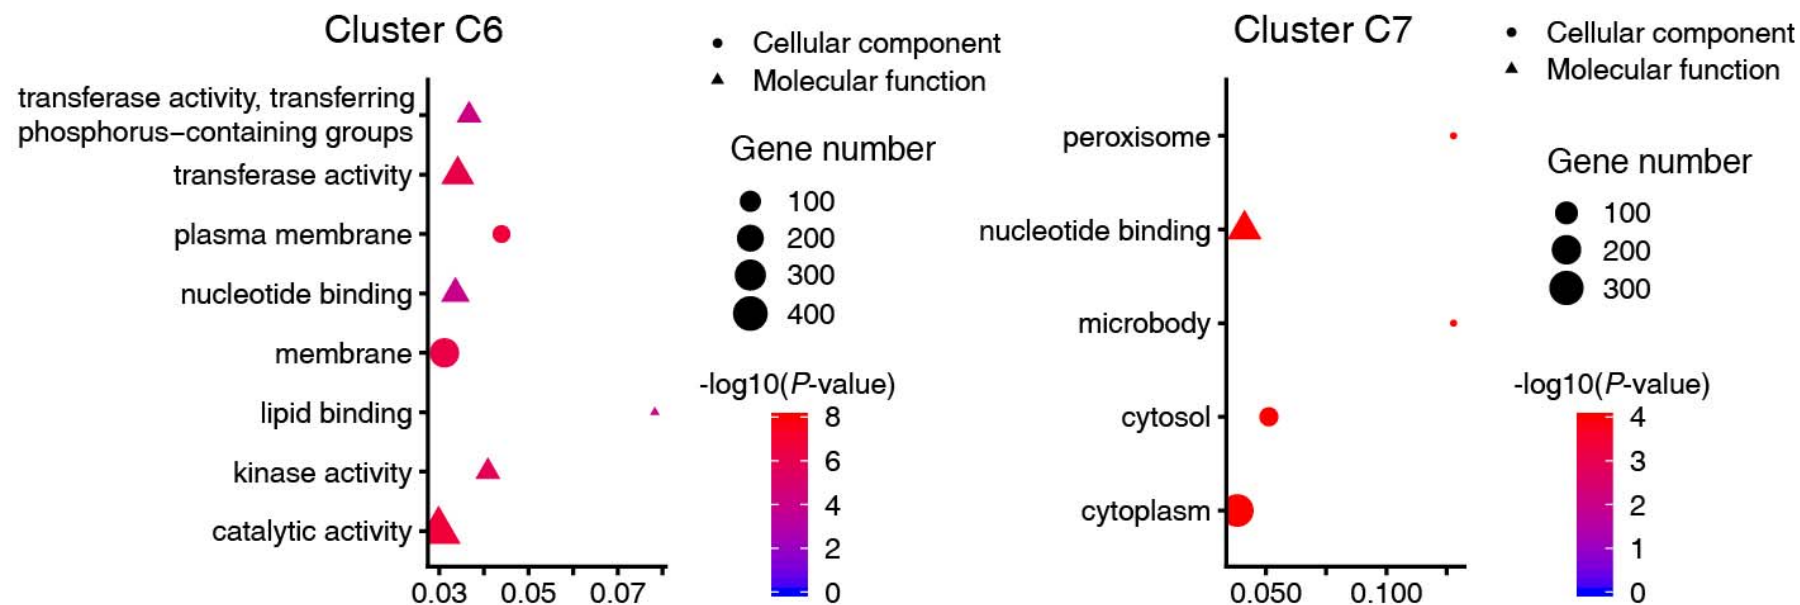

**Supplementary Figure S2. GO enrichment analysis of genes specifically expressed in Cluster C6 and C7.** Dotplot showing the GO terms of genes specifically expressed in Cluster C6 and C7. The  $x$  axis represents the number of genes in the list /the number of genes in the background. The color of each dot represents  $-\log_{10}(P\text{-value})$ , the size of each dot represents the number of genes in the list, and the dot shape represents the GO term category.

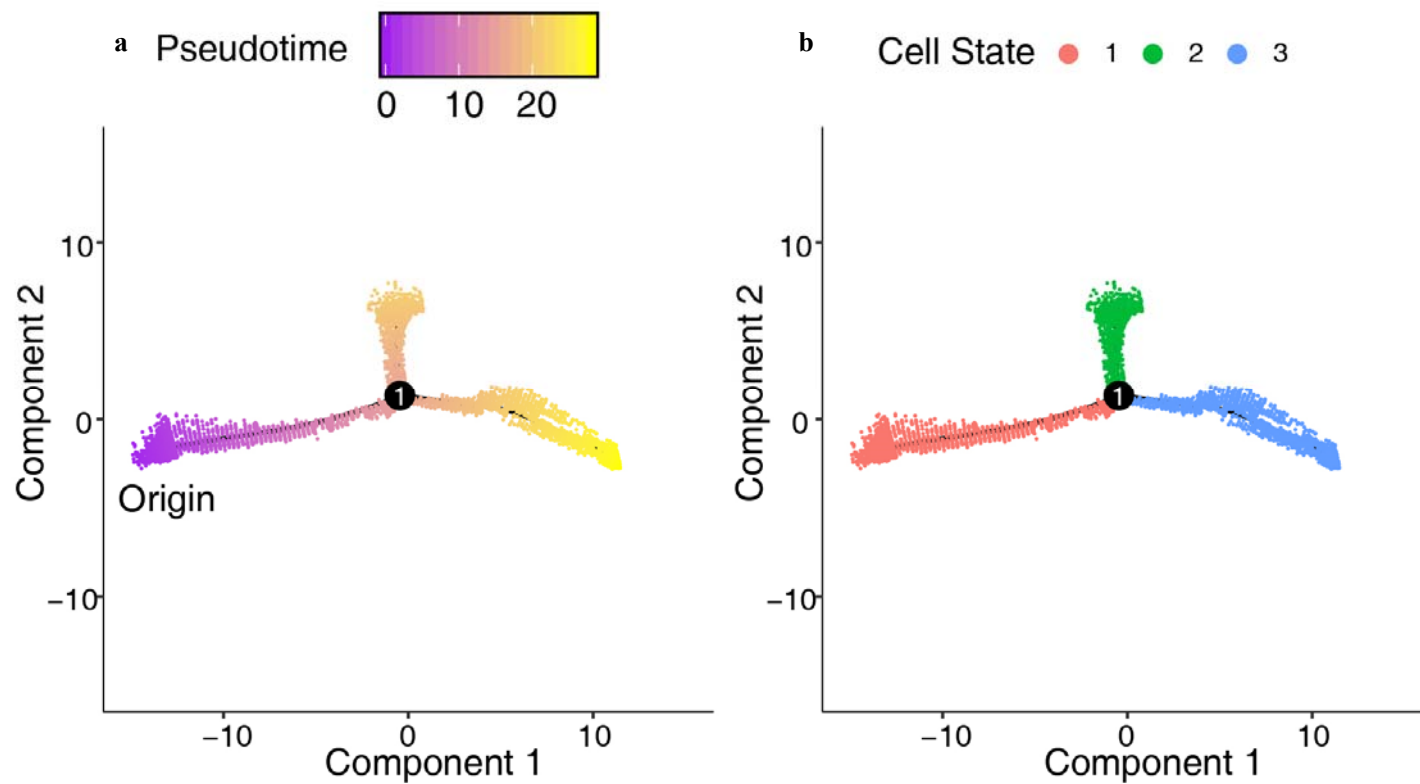

**Supplementary Figure S3. Pseudo-time trajectory of all M cells.** **A** The scatter plot illustrating the Pseudo-time trajectory. Each point represents a single M cell; the color of the cell represents the pseudo-time of the cell. The text “Origin” represents the defined root of the trajectory. **B** The scatter plot illustrating Pseudo-time trajectory of cell states. Each point represents a single M cell; the color of the cell represents a different cell state generated by monocles. The root can be switched to each end of the states.

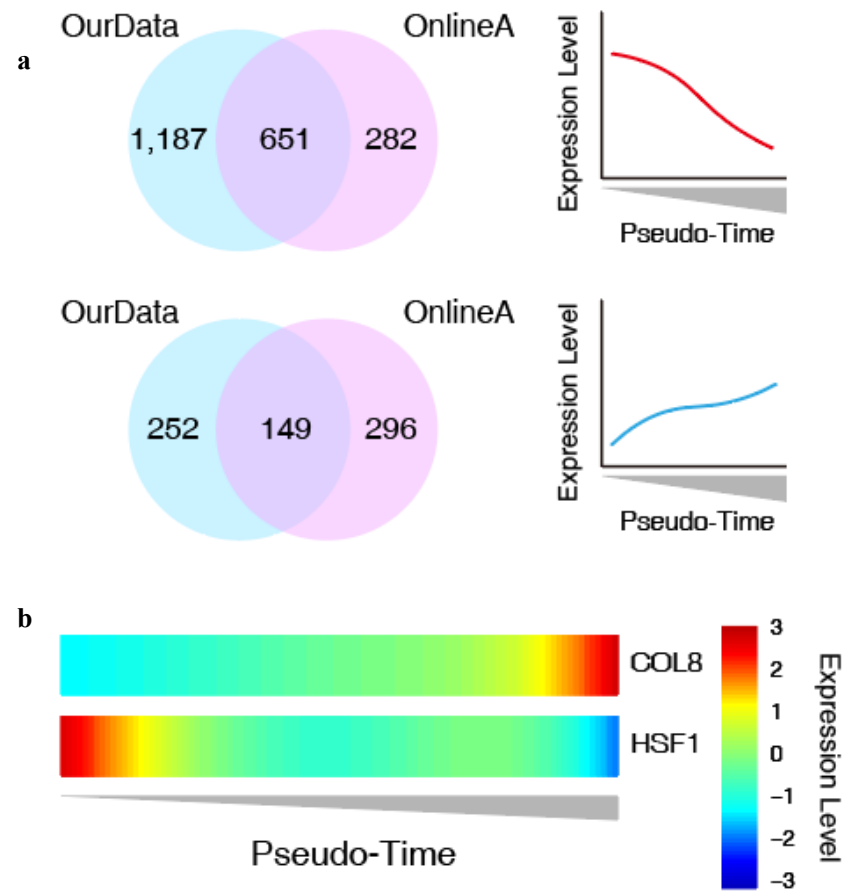

**Supplementary Figure S4. Pseudo-time trajectory of the online maize scRNA-seq data.** **A** Venn diagram showing the intersections of DEGs across pseudo-time between our data and the published scRNA-seq datasets ([Bezruczyk et al., 2021](#)). The top panel indicates genes highly expressed in the lower pseudo-time while the bottom panel indicates genes highly expressed in the higher pseudo-time. **B** Expression profiles of COL8 and HSF1 in the published scRNA-seq data set ([Bezruczyk et al., 2021](#)).



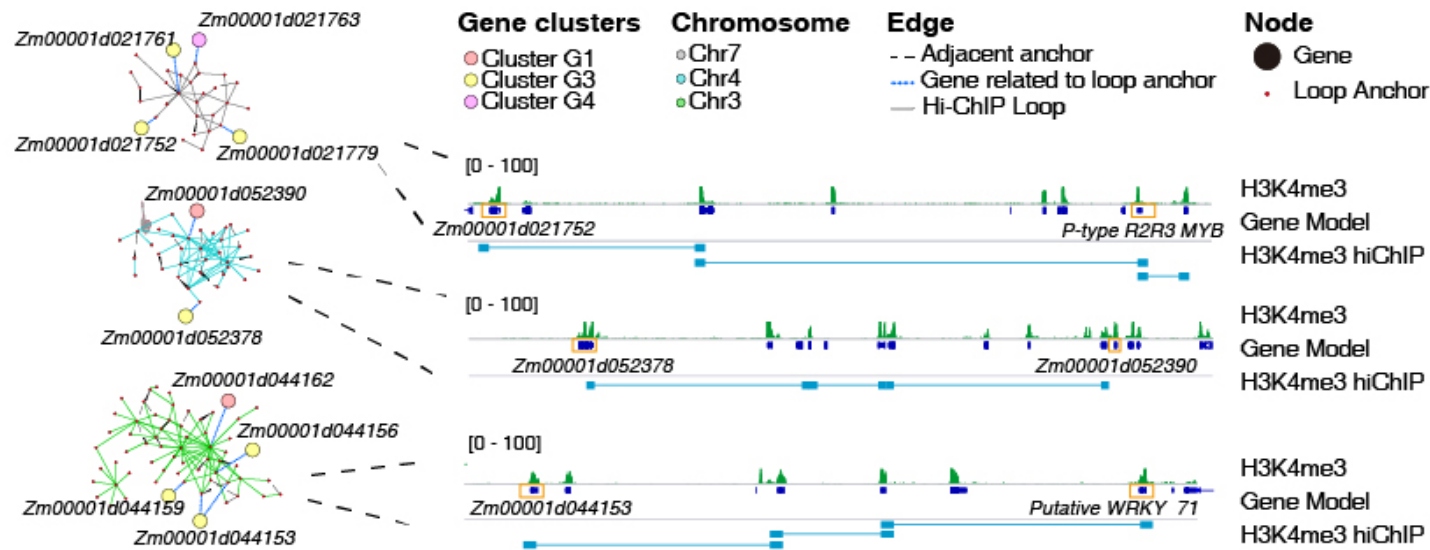

**Supplementary Figure S6. H3K4me3 HiChIP network showing genes connected by chromatin loop for TFs.** Bigger dots represent genes associated with the loop anchor region; small dots represent loop anchors in a 5 kb region. Solid lines represent connections of two anchors by H3K4me3 Hi-ChIP loops. Dashed lines represent adjacent anchor connections. Arrows represent connections between loop anchors and genes. IGV snap shots showing co-expressed genes and TFs connected by H3K4me3 HiChIP loops.

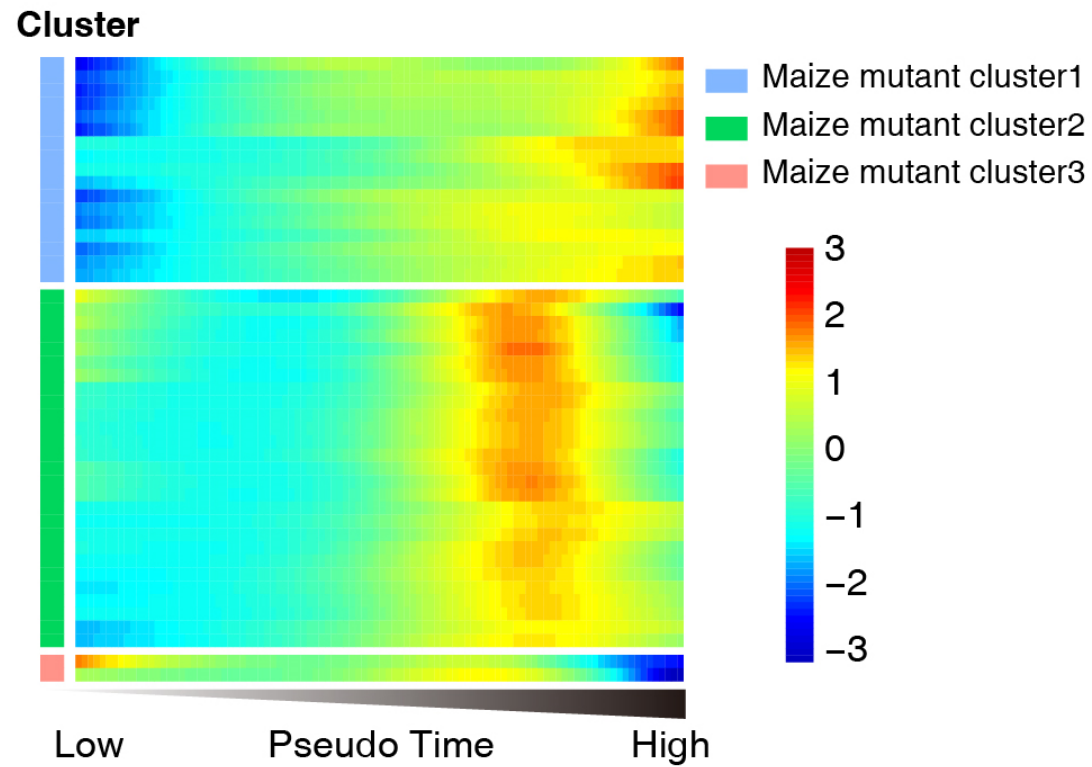

**Supplementary Figure S7. Expression heatmap exhibiting 46 genes required for chloroplast biogenesis across the pseudo-time.** It has been documented that functional defects in these genes affect photosynthesis ([Belcher \*et al.\*, 2015](#)).

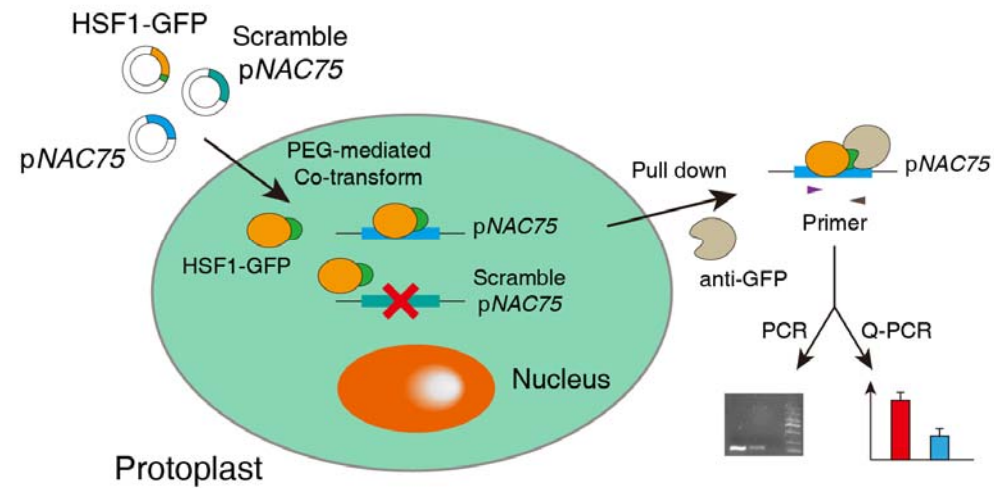

**Supplementary Figure S8. Schematic workflow of HSF1-IP-PCR assay.** HSF1 overexpressed plasmid DNA and plasmid containing promoter of *NAC75* (*PNAC75*) with HSF1 binding and corresponding scrambled sequences were co-transformed into M cells. Anti-GFP antibody was used to pull down the GFP fused with HSF1.
